# Supplementary material
Source: Springer Nature journal article supplement (https://www.springermedizin.de/resource/supplementary/13046_2009_248_MOESM10_ESM.pdf/9661820)

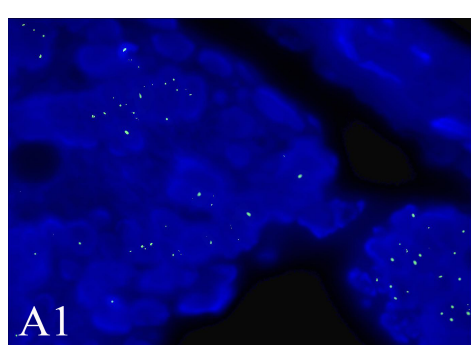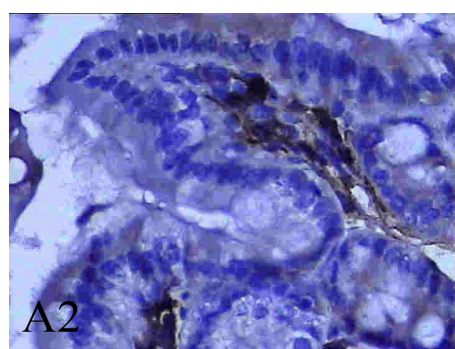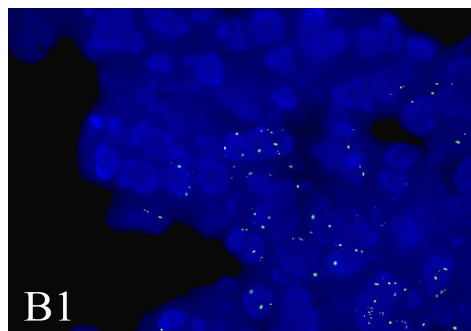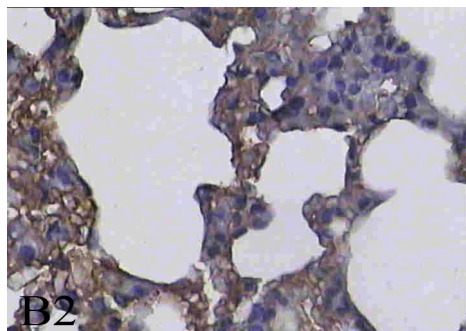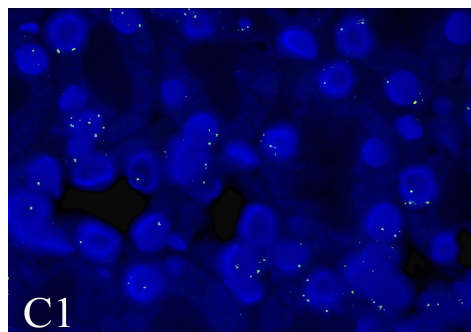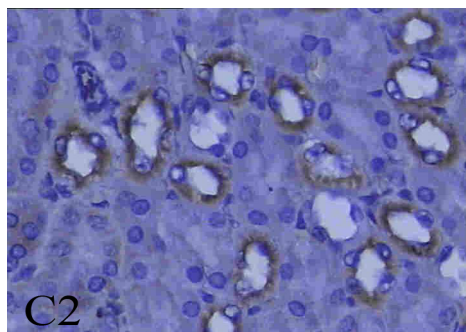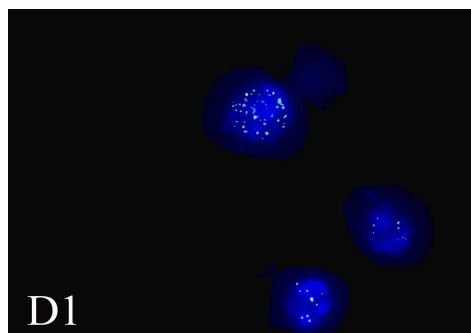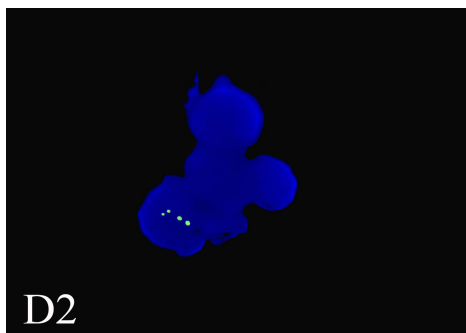

Supplement: MOESM10 [file 9661820]
